# Supplementary material for: La introducción del BlackBerry Enterprise Server en colaboración con Lotus Dominio maximiza la inversión en la infraestructura de los servicios financieros
Source: Royal Society of Chemistry journal article supplement (doi:10.1039/d4tb01801j), 2007-01-01
Supplement: d4tb01801j1.pdf [file d4tb01801j1.pdf]

## Tuning the Affinity with Transmembrane Protein by Constructing Peptide-Conjugated *cis/trans* Isomers Based on Molecular Scaffold

Jing-Jing Hu,<sup>1</sup> Juliang Yang,<sup>1</sup> Yiheng Liu,<sup>1</sup> Guangwen Lu,<sup>1</sup> Zujin Zhao,<sup>2</sup> Fan Xia<sup>1</sup> and Xiaoding Lou<sup>1,\*</sup>

<sup>1</sup>State Key Laboratory of Biogeology and Environmental Geology, Faculty of Materials Science and Chemistry, China University of Geosciences, Wuhan 430078, China

<sup>2</sup>State Key Laboratory of Luminescent Materials and Devices, Guangdong Provincial Key Laboratory of Luminescence from Molecular Aggregates, South China University of Technology, Guangzhou 510640, China

## Table of Contents

|                                                                                                                                                          |     |
|----------------------------------------------------------------------------------------------------------------------------------------------------------|-----|
| 1. Materials and methods                                                                                                                                 | S2  |
| 2. Synthesis and characterization                                                                                                                        | S2  |
| 3. Experimental section                                                                                                                                  | S5  |
| 4. Statistical analysis                                                                                                                                  | S6  |
| 5. Table S1. Peptide sequences used in this study                                                                                                        | S7  |
| 6. Table S2. The time program for separating <i>cis</i> -RTP and <i>trans</i> -RTP                                                                       | S8  |
| 7. Table S3. The time program for separating <i>cis</i> -RTC and <i>trans</i> -RTC                                                                       | S9  |
| 8. Figure S1. HRMS spectrum of TP                                                                                                                        | S10 |
| 9. Figure S2. HRMS spectrum of <i>cis</i> -RTP                                                                                                           | S11 |
| 10. Figure S3. HRMS spectrum of <i>trans</i> -RTP                                                                                                        | S12 |
| 11. Figure S4. <sup>1</sup> H NMR spectrum of <i>cis</i> -RTP in DMSO- <i>d</i> <sub>6</sub>                                                             | S13 |
| 12. Figure S5. <sup>1</sup> H NMR spectrum of <i>trans</i> -RTP in DMSO- <i>d</i> <sub>6</sub>                                                           | S14 |
| 13. Figure S6. UV-vis absorption spectra of probes in DMSO/water mixture                                                                                 | S15 |
| 14. Figure S7. <sup>1</sup> H- <sup>1</sup> H COSY NMR spectrum of <i>cis</i> -RTP in DMSO- <i>d</i> <sub>6</sub>                                        | S16 |
| 15. Figure S8. <sup>1</sup> H- <sup>1</sup> H COSY NMR spectrum of <i>trans</i> -RTP in DMSO- <i>d</i> <sub>6</sub>                                      | S17 |
| 16. Figure S9. HRMS spectrum of TC                                                                                                                       | S18 |
| 17. Figure S10. HRMS spectrum of <i>cis</i> -RTC                                                                                                         | S19 |
| 18. Figure S11. HRMS spectrum of <i>trans</i> -RTC                                                                                                       | S20 |
| 19. Figure S12. <sup>1</sup> H NMR spectrum of <i>cis</i> -RTC in D <sub>2</sub> O                                                                       | S21 |
| 20. Figure S13. <sup>1</sup> H NMR spectrum of <i>trans</i> -RTC in D <sub>2</sub> O                                                                     | S22 |
| 21. Figure S14. UV-vis absorption spectra and FL spectra of <i>cis</i> -RTC/ <i>trans</i> -RTC in DMSO/water mixture                                     | S23 |
| 22. Figure S15 FL spectra of <i>cis</i> -RTP, <i>trans</i> -RTP, <i>cis</i> -RTC and <i>trans</i> -RTC versus different proteins                         | S24 |
| 23. Figure S16. Plot of (I- I <sub>0</sub> )/I <sub>0</sub> versus different proteins                                                                    | S25 |
| 24. Figure S17. CLSM images of SKOV3 cells incubated with <i>cis</i> -RTP/ <i>trans</i> -RTP                                                             | S26 |
| 25. Figure S18. FL spectra of <i>cis</i> -RTP, <i>trans</i> -RTP, <i>cis</i> -RTC and <i>trans</i> -RTC with extracted cell membrane for different times | S27 |
| 26. Figure S19. ITC results of <i>trans</i> -RTP and <i>cis</i> -RTC/ <i>trans</i> -RTC in PBS with cell membrane                                        | S28 |
| 27. Figure S20. The angles between the linkages of RGD and Pal-RRRR to benzene rings in <i>cis</i> -RTP/ <i>trans</i> -RTP                               | S29 |
| 28. Figure S21. The adhesion result of suspended SKOV3 cells incubated with <i>cis</i> -RTC/ <i>trans</i> -RTC                                           | S30 |
| 29. Figure S22. The cell migration result of SKOV3 cells incubated with <i>cis</i> -RTC/ <i>trans</i> -RTC                                               | S31 |
| 30. Figure S23. CLSM images of the actin in SKOV3 cells incubated with <i>cis</i> -RTC/ <i>trans</i> -RTC and quantification data                        | S32 |

## 1. Materials and methods.

All peptides were purchased from GL Biochem Ltd. (Shanghai, China). 3-(4,5-Dimethylthiazol-2-yl)-2,5-diphenyl-tetrazolium bromide (MTT), cuprous bromide and sodium ascorbate (SA) were bought from Beijing InnoChem Science & Technology Co., Ltd. (Beijing, China). The Actin-Tracker Red-555 was purchased from Beyotime Institute of Biothechnology. Deionized water (18.2 M $\Omega$ -cm) was obtained with Heal Force water purification system. High resolution mass spectra (HRMS) were recorded on a Thermo Scientific Q Exactive mass spectrometer system operating in an ESI-Orbitrap mode. NMR spectra were measured on a Bruker Avance III HD 400 MHz NMR spectrometer. High performance liquid chromatography (HPLC) was performed by using Shimadzu LC-20A equipped with an Ultimate C18 column (10  $\mu$ m, 250  $\times$  4.6 mm) from Welch. UV-vis absorption spectra were taken on a Shimadzu UV-2600 spectrometer. All fluorescence measurements were performed on an Edinburgh FS5 Fluorescence Spectrophotometer. Confocal laser scanning microscopy images were obtained on a Zeiss LSM 880 confocal laser scanning microscope. MTT assay was obtained on an Infinite M200 PRO Microplate Reader (Tecan, Austria).

## 2. Synthesis and characterization.

### 2.1. Synthesis of RTP.

#### 2.1.1. Synthesis of TP.

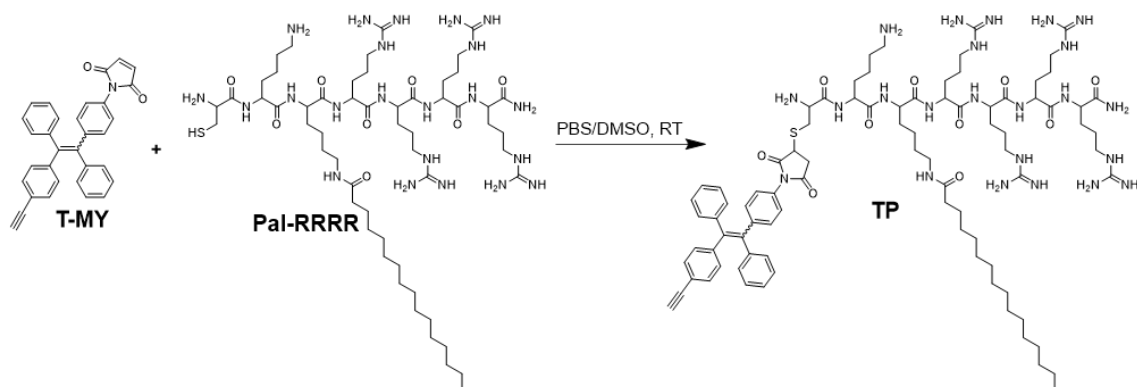

#### Scheme S1. Synthetic route of TP.

T-MY (9.0 mg, 20  $\mu$ mol, 2 equiv.) was dissolved in DMSO and Pal-RRRR (12.4 mg, 10  $\mu$ mol, 1 equiv.) was dissolved in PBS. The volume ratio of DMSO to PBS was 1:1. The reaction was stirred at room temperature under the protection of nitrogen and was monitored by HPLC. After the reaction was completed, the crude product was separated by semi-preparative HPLC. The product was freeze-dried to afford a light yellow solid (14.4 mg, yield: 85%). High-resolution mass spectra termed HRMS (ESI) m/z: [M+3H]<sup>3+</sup> calcd, 564.3461; found, 564.6793. [M+4H]<sup>4+</sup> calcd, 423.5114; found, 423.7609. [M+5H]<sup>5+</sup> calcd, 339.0106; found, 339.0101.

## 2.1.2. Synthesis of RTP.

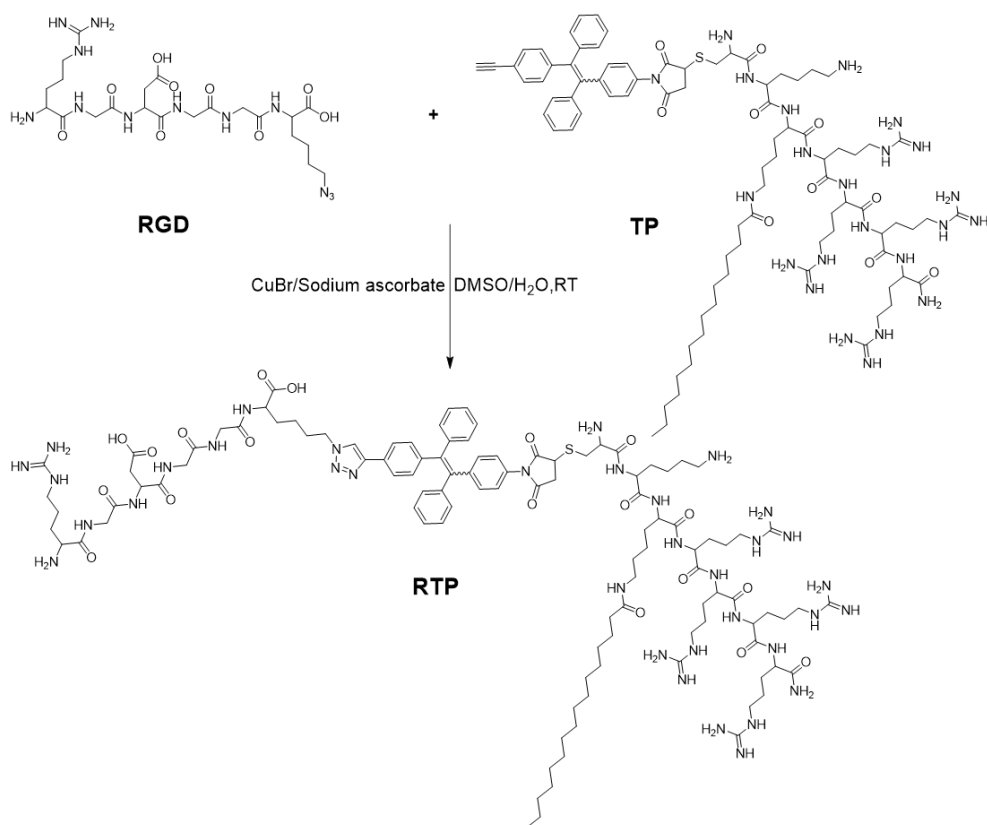

### Scheme S2. Synthetic route of RTP.

RGD (6.1 mg, 10  $\mu\text{mol}$ , 2 equiv.), TP (8.5 mg, 5  $\mu\text{mol}$ , 1 equiv.), sodium ascorbate (2.0 mg, 10  $\mu\text{mol}$ , 2 equiv.) and CuBr (1.5 mg, 10  $\mu\text{mol}$ , 2 equiv.) were dissolved in DMSO/H<sub>2</sub>O (v/v=1:1) and stirred at room temperature under the protection of nitrogen. The reaction was monitored by HPLC. After the reaction was completed, the crude product was separated by semi-preparative HPLC. The product was freeze-dried to afford a light yellow solid (5.5 mg, yield: 48%). HRMS (ESI)  $m/z$ :  $[\text{M}+3\text{H}]^{3+}$  calcd, 769.1089; found, 769.4456.  $[\text{M}+4\text{H}]^{4+}$  calcd, 577.0835; found, 577.3367.  $[\text{M}+5\text{H}]^{5+}$  calcd, 461.8683; found, 462.0702.  $[\text{M}+6\text{H}]^{6+}$  calcd, 385.0581; found, 385.2260.

## 2.2. Synthesis of RTC.

### 2.2.1. Synthesis of TC.

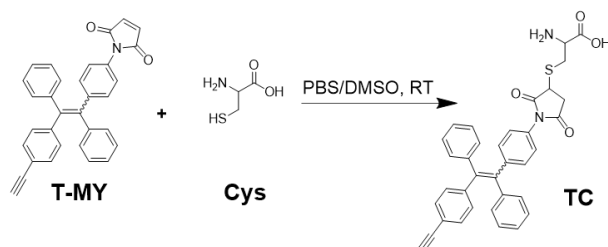

### Scheme S3. Synthetic route of TC.

T-MY (9.0 mg, 20  $\mu\text{mol}$ , 2 equiv.) was dissolved in DMSO and cysteine (Cys) (1.2 mg, 10  $\mu\text{mol}$ , 1 equiv.) was dissolved in PBS. The volume ratio of DMSO to PBS was 1:1. The reaction was stirred at room temperature under the protection of nitrogen and was monitored by HPLC. After the reaction was completed, the crude product was separated by semi-preparative HPLC. The product was freeze-dried to afford a light yellow solid

(4.7 mg, yield: 83%). HRMS (ESI)  $m/z$ :  $[M+H]^+$  calcd, 573.1843; found, 573.1838.

## 2.2.2. Synthesis of RTC.

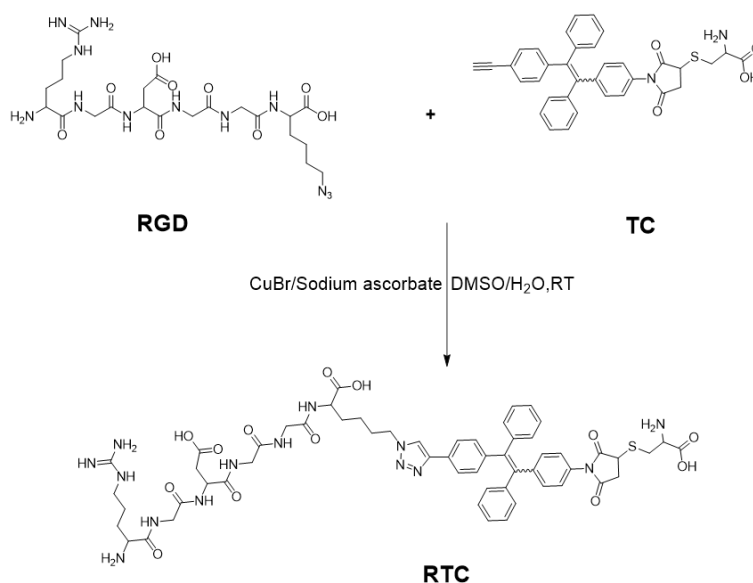

### Scheme S4. Synthetic route of RTC.

RGD (6.1 mg, 10  $\mu$ mol, 2 equiv.), TC (2.9 mg, 5  $\mu$ mol, 1 equiv.), sodium ascorbate (2.0 mg, 10  $\mu$ mol, 2 equiv.) and CuBr (1.5 mg, 10  $\mu$ mol, 2 equiv.) were dissolved in DMSO/H<sub>2</sub>O (v/v=1:1) and stirred at room temperature under the protection of nitrogen. The reaction was monitored by HPLC. After the reaction was completed, the crude product was separated by semi-preparative HPLC. The product was freeze-dried to afford a light yellow solid (3.3 mg, yield: 56%). HRMS (ESI)  $m/z$ :  $[M+H]^+$  calcd, 1187.4722; found, 1187.4722.  $[M+2H]^{2+}$  calcd, 594.2397; found, 594.2397.

## 3. Experimental section

### 3.1. Theoretical calculation of binding energy

The cis-RTP was docking to the protein  $\alpha_v\beta_3$  (PDBID: 1L5G) with ADT tools package provided by AutoDock 4.2, as well as the trans-RTP. The docking complex was embedded to a bilayer membrane. The bilayer membranes used was built by CHARMM-GUI input generator, and it was solvated in a TIP3P water model with 0.15 M KCl, in a size of 184.1  $\times$  183.3  $\times$  166.8  $\text{\AA}^3$  containing about 575000 atoms. The ratio of 1,2-dioleoyl-sn-glycero-3-phosphocholine (DOPC) to 1,2-dioleoyl-sn-glycero-3-phospho-L-serine (DOPS) is almost 7:3 (total 892 lipids, including 624 DOPC and 268 DOPS, were used in the membranes. 6 DOPC and 2 DOPS were removed to stabilize the orientation and the depth of protein insertion in the membrane). Unbiased MD simulations by GROMACS simulation package with CHARMM36m force field were carried out to equilibrate the system for 2 ns, production simulation for 100 ns and the last 10 ns were used for analysis. The stable cis-RTP and trans-RTP structure were got from the MD simulations, to calculation the volume by Monte-Carlo method. The volumes were calculated based on the 0.001 e/bohr<sup>3</sup> charge density envelope, which was a general rule proposed by Bader.

### 3.2. Isothermal titration calorimetry (ITC) experiments

All ITC measurements were performed on a MicroCal ITC200 microisothermal titration calorimeter at 37°C. The disrupted cell membranes were dripped into the sample cell 10 µL each time, a total of 20 drips. The concentration of the probe was 40 µM.

### **3.3. Cell culture**

The SKOV3 cells were cultured in Dulbecco's modified Eagle's medium (DMEM) containing 10% fetal bovine serum (FBS), 1% penicillin and streptomycin (PS) and 5% carbon dioxide at 37°C in a humidified environment. Before CLSM imaging, we first seeded SKOV3 cells into glass-bottom cell culture dishes. When the cells grew to about 70%, the cells were washed for 3 times with PBS. The fresh medium containing the probes was then added to the dishes.

### **3.4. Confocal laser scanning microscopy (CLSM)**

The fluorescence signals of cells were obtained by using the 63x oil immersion objective of an LSM 880 confocal microscope from Zeiss. The probes were excited with a 405 nm laser and fluorescent signals were collected in the 450-550 nm range. FAM and Actin-Tracker Red-555 were selected and excited with a 543 nm laser. Their fluorescence signals were collected in the 550-600 nm range.

### **3.5. Cell adhesion assay**

The SKOV3 cells suspension was incubated with 1 mL of 40 µM probes for 1 h, then they were centrifuged and the supernatant was discarded. After 4 h of incubation with fresh medium, the cells were imaged with CLSM and the number of cells was counted.

### **3.6. Cell wound scratch assay**

When the SKOV3 cells in the glass bottom dish had grown to 95%, a scratch was created on the dish with a 10 µL pipette tip. Subsequently, the SKOV3 cells were incubated with 40 µM probes for 1 h. Scratches were imaged at 0 h and 24 h.

### **3.7. Cytotoxicity assay**

When the SKOV3 cells reached 80% in the 96-well plate, different concentrations of probes were added to the corresponding wells and 5 replicate wells were set for each concentration. After 24 h of probe incubation, MTT in PBS (10 µL) was added to each well. After 4 h of incubation in the dark, the supernatant was aspirated and DMSO (150 µL) was added to each well. Finally, the absorbance of MTT at 570 nm was detected with an Infinite M200 PRO microplate reader.

## **4. Statistical analysis.**

The quantitative data were expressed as mean ± standard deviation (SD). All the experiments were repeated for at least 3 times. The statistical analysis was conducted using a two-sided Student's t-test or one-way ANOVA. P value < 0.05 was considered statistically significant.

**Table S1.** Peptide sequences used in this study.

| <b>Species</b>          | <b>Peptide sequence (N~C)</b> |
|-------------------------|-------------------------------|
| <b><i>cis</i>-RTP</b>   | RGDGGK-TPE-CKK(Pal)RRRR       |
| <b><i>trans</i>-RTP</b> | RGDGGK-TPE-CKK(Pal)RRRR       |
| <b><i>cis</i>-RTC</b>   | RGDGGK-TPE-C                  |
| <b><i>trans</i>-RTC</b> | RGDGGK-TPE-C                  |

**Table S2.** The time program for separating *cis*-RTP and *trans*-RTP.

| <b>Time (min)</b> | <b>Solvent A<br/>(Water containing 1% trifluoroacetic acid)</b> | <b>Solvent B<br/>(Acetonitrile containing 1% trifluoroacetic acid)</b> | <b>Flow rate V</b> |
|-------------------|-----------------------------------------------------------------|------------------------------------------------------------------------|--------------------|
| 0                 | 60%                                                             | 40%                                                                    | 1 mL/min           |
| 20                | 50%                                                             | 50%                                                                    | 1 mL/min           |



**Table S3.** The time program for separating *cis*-RTC and *trans*-RTC.

| <b>Time (min)</b> | <b>Solvent A<br/>(Water containing 1%<br/>trifluoroacetic acide)</b> | <b>Solvent B<br/>(Acetonitrile containing<br/>1% trifluoroacetic acide)</b> | <b>Flow rate V</b> |
|-------------------|----------------------------------------------------------------------|-----------------------------------------------------------------------------|--------------------|
| 0                 | 80%                                                                  | 20%                                                                         | 2 mL/min           |
| 20                | 60%                                                                  | 40%                                                                         | 2 mL/min           |
| 25                | 40%                                                                  | 60%                                                                         | 2 mL/min           |
| 30                | 10%                                                                  | 90%                                                                         | 2 mL/min           |
| 45                | 0%                                                                   | 100%                                                                        | 2 mL/min           |
| 50                | 0%                                                                   | 100%                                                                        | 2 mL/min           |

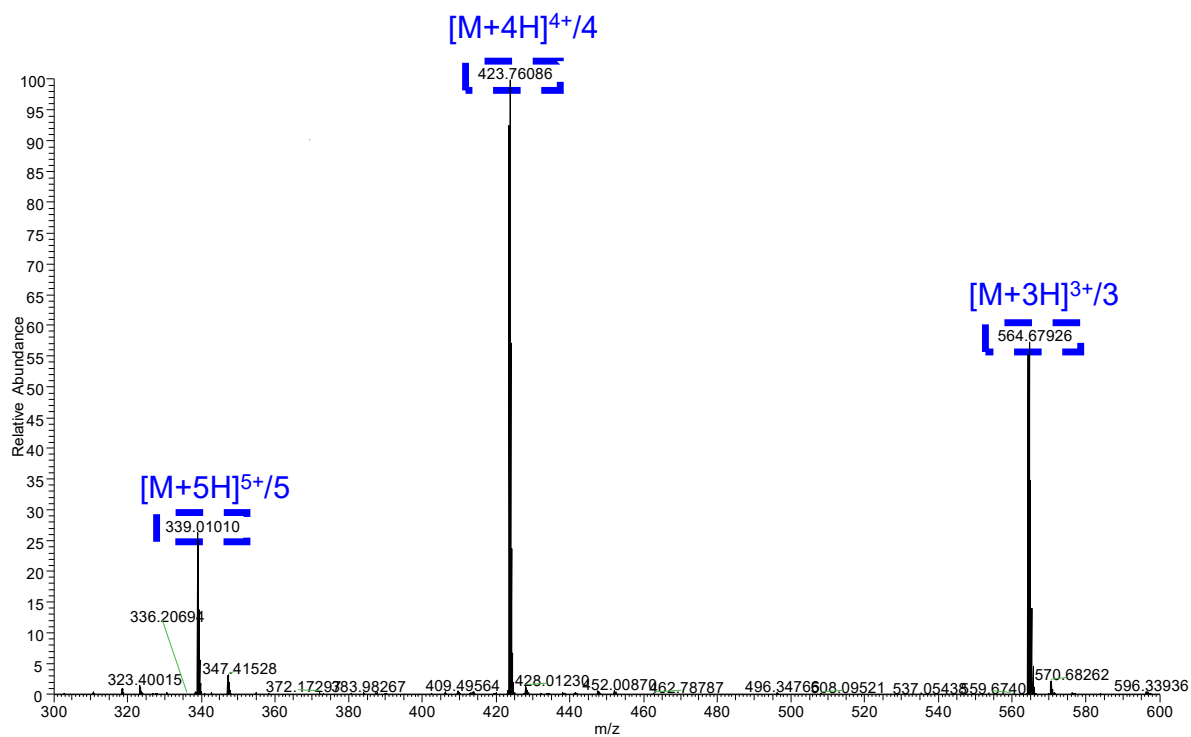

| TP  | $[M+3H]^{3+}/3$ | $[M+4H]^{4+}/4$ | $[M+5H]^{5+}/5$ |
|-----|-----------------|-----------------|-----------------|
| m/z | 564.3461        | 423.5114        | 339.0106        |

Figure S1. HRMS of TP. The *cis*-TP and *trans*-TP have the same molecule weight.

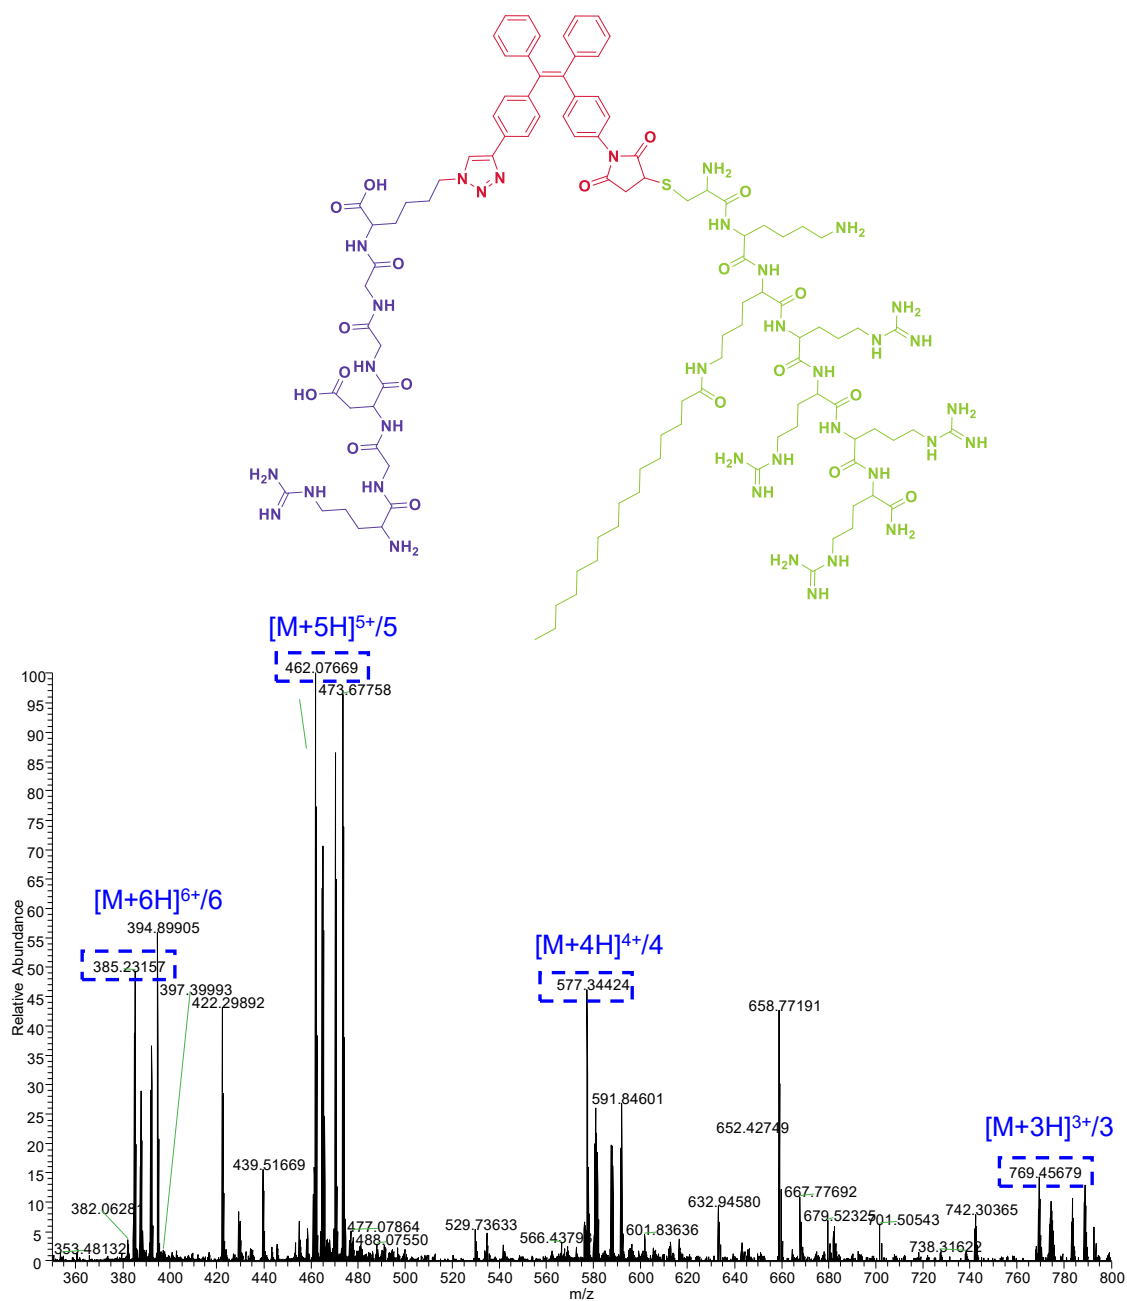

| <i>cis</i> -RTP | [M+3H] <sup>3+</sup> /3 | [M+4H] <sup>4+</sup> /4 | [M+5H] <sup>5+</sup> /5 | [M+6H] <sup>6+</sup> /6 |
|-----------------|-------------------------|-------------------------|-------------------------|-------------------------|
| m/z             | 769.1089                | 577.0835                | 461.8683                | 385.0581                |

Figure S2. HRMS spectrum of *cis*-RTP.

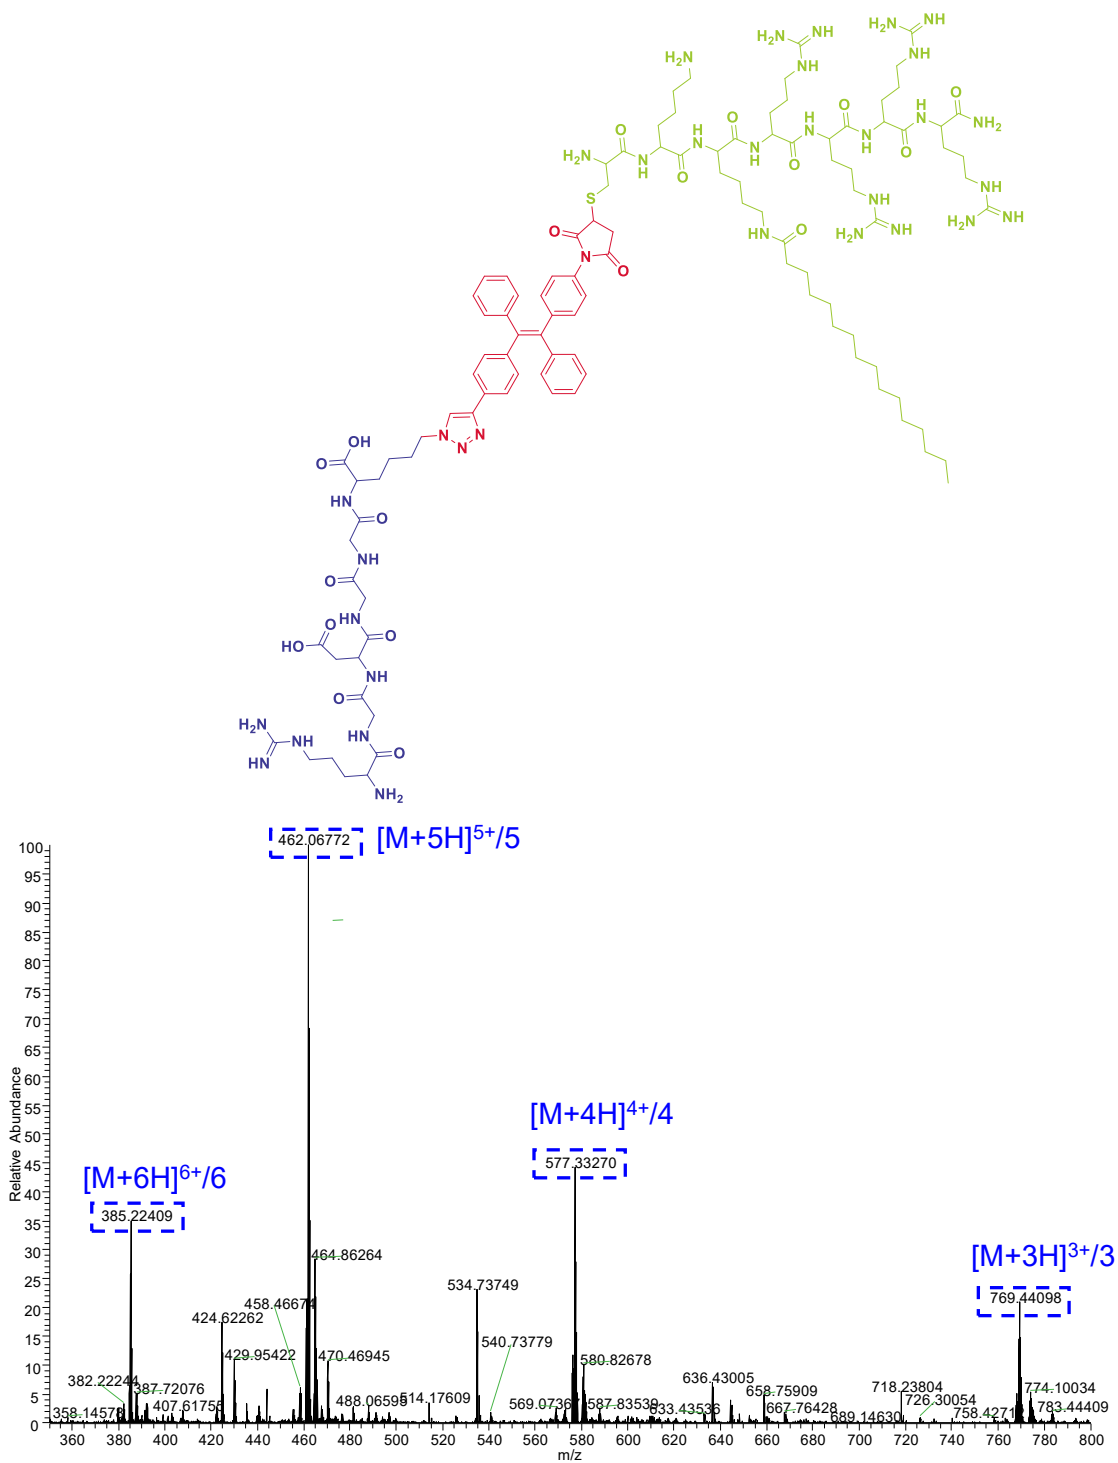

| <i>trans</i> -RTP | $[M+3H]^{3+}/3$ | $[M+4H]^{4+}/4$ | $[M+5H]^{5+}/5$ | $[M+6H]^{6+}/6$ |
|-------------------|-----------------|-----------------|-----------------|-----------------|
| m/z               | 769.1089        | 577.0835        | 461.8683        | 385.0581        |

Figure S3. HRMS spectrum of *trans*-RTP.

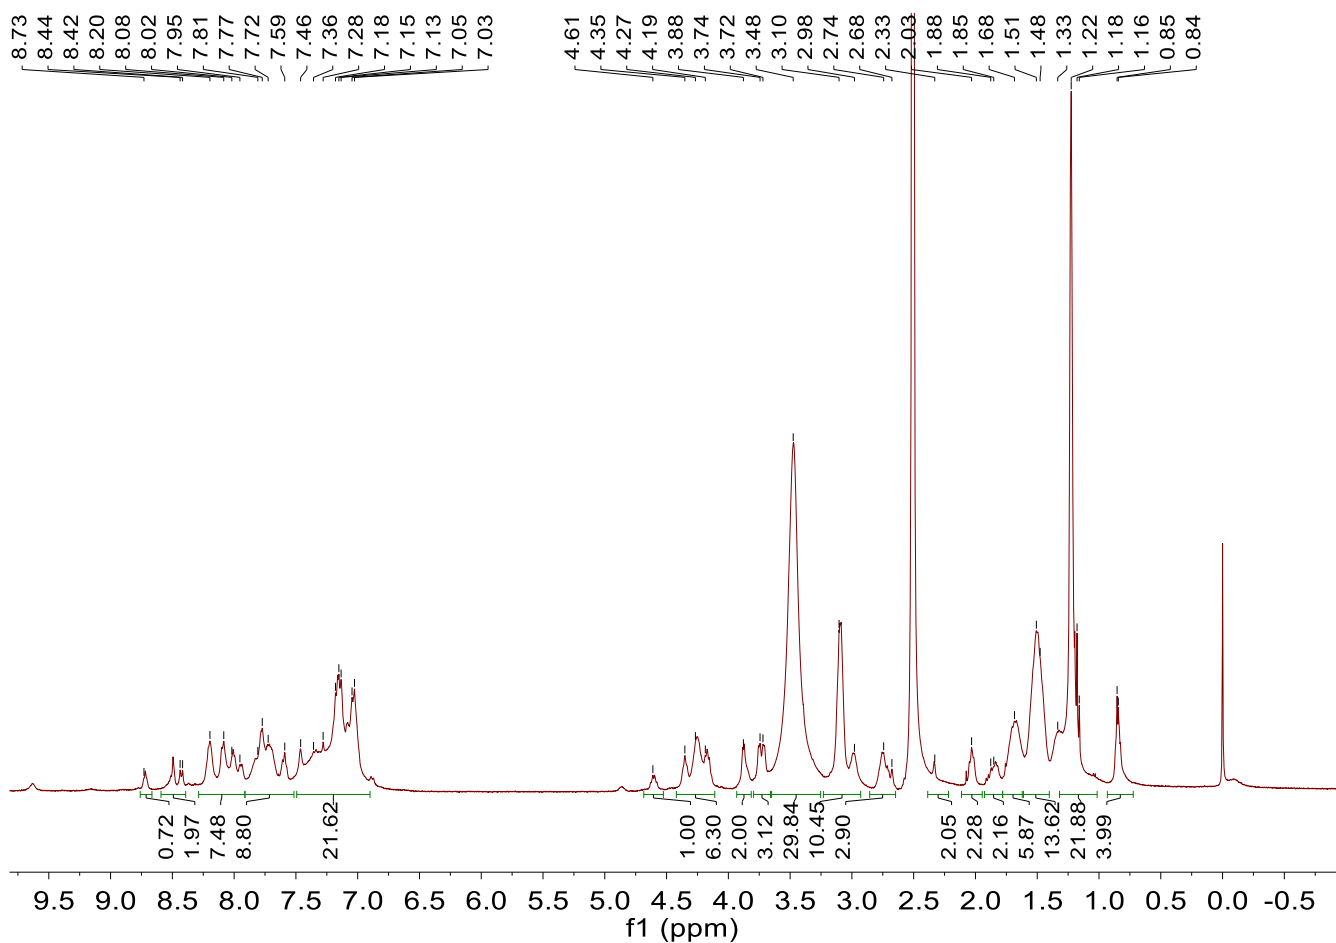

**Figure S4.**  $^1\text{H}$  NMR spectrum of *cis*-RTP in  $\text{DMSO-}d_6$ .

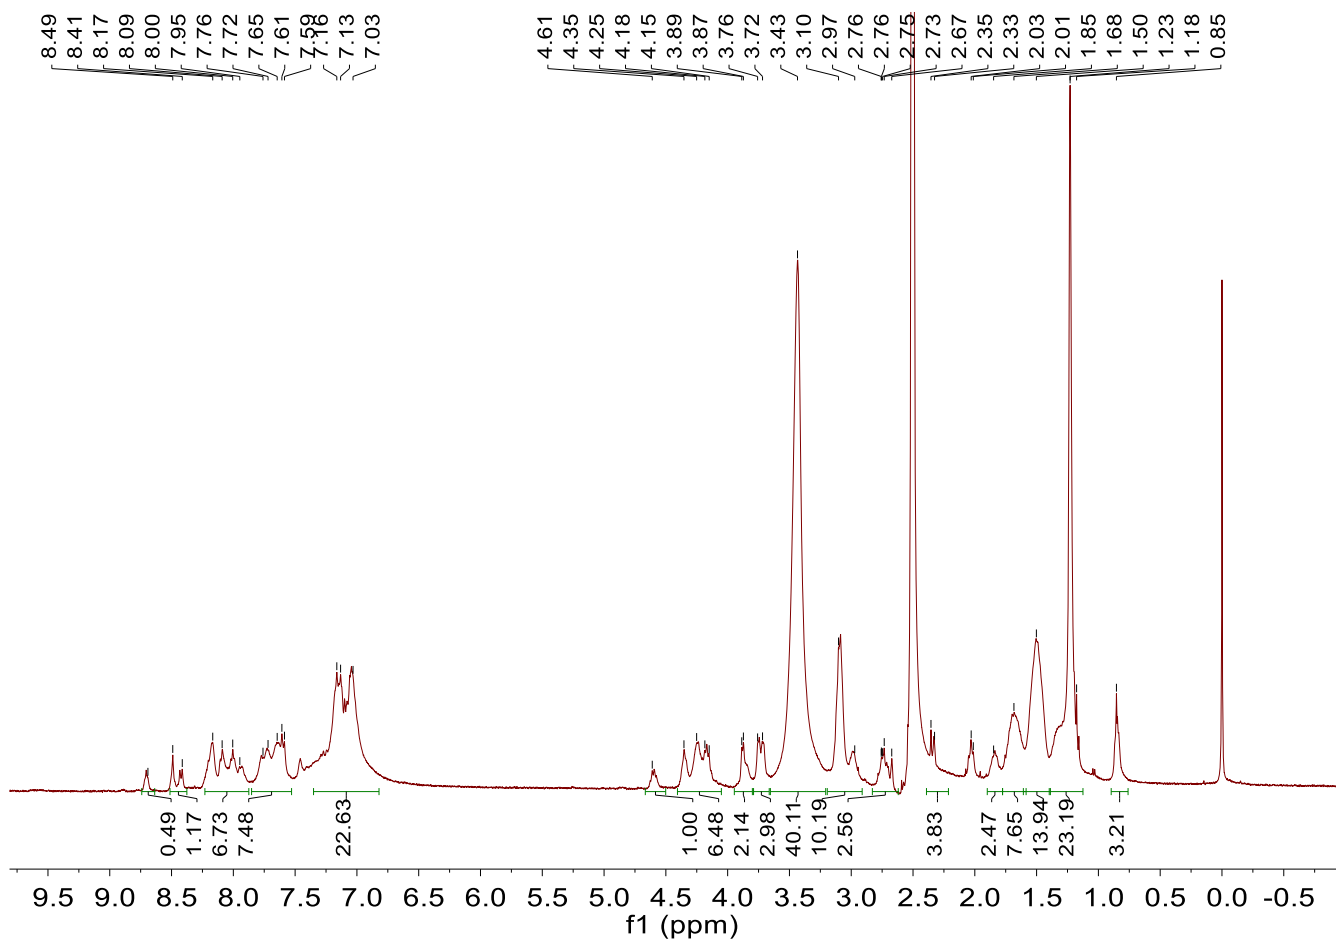

**Figure S5.**  $^1\text{H}$  NMR spectrum of *trans*-RTP in  $\text{DMSO-}d_6$ .

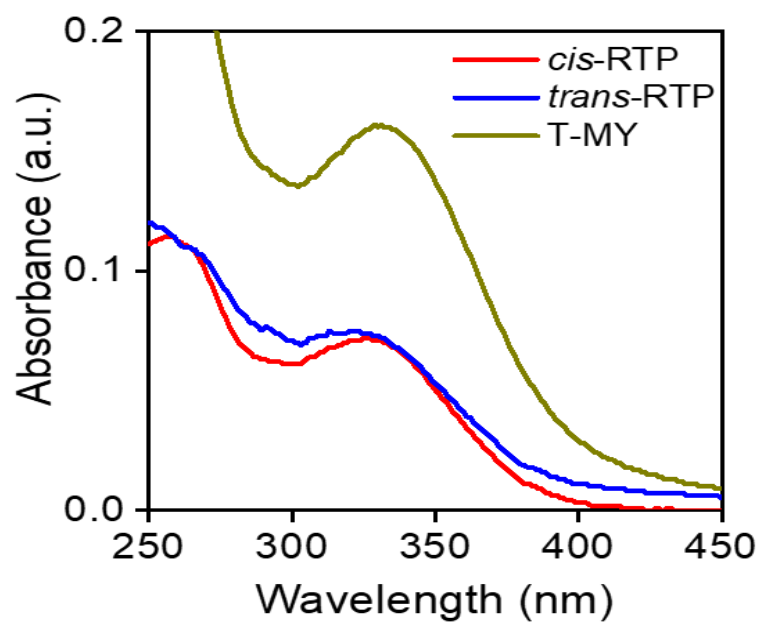

**Figure S6.** UV-vis absorption spectra of probes (10  $\mu$ M) in DMSO/water mixture (v/v=1/99).

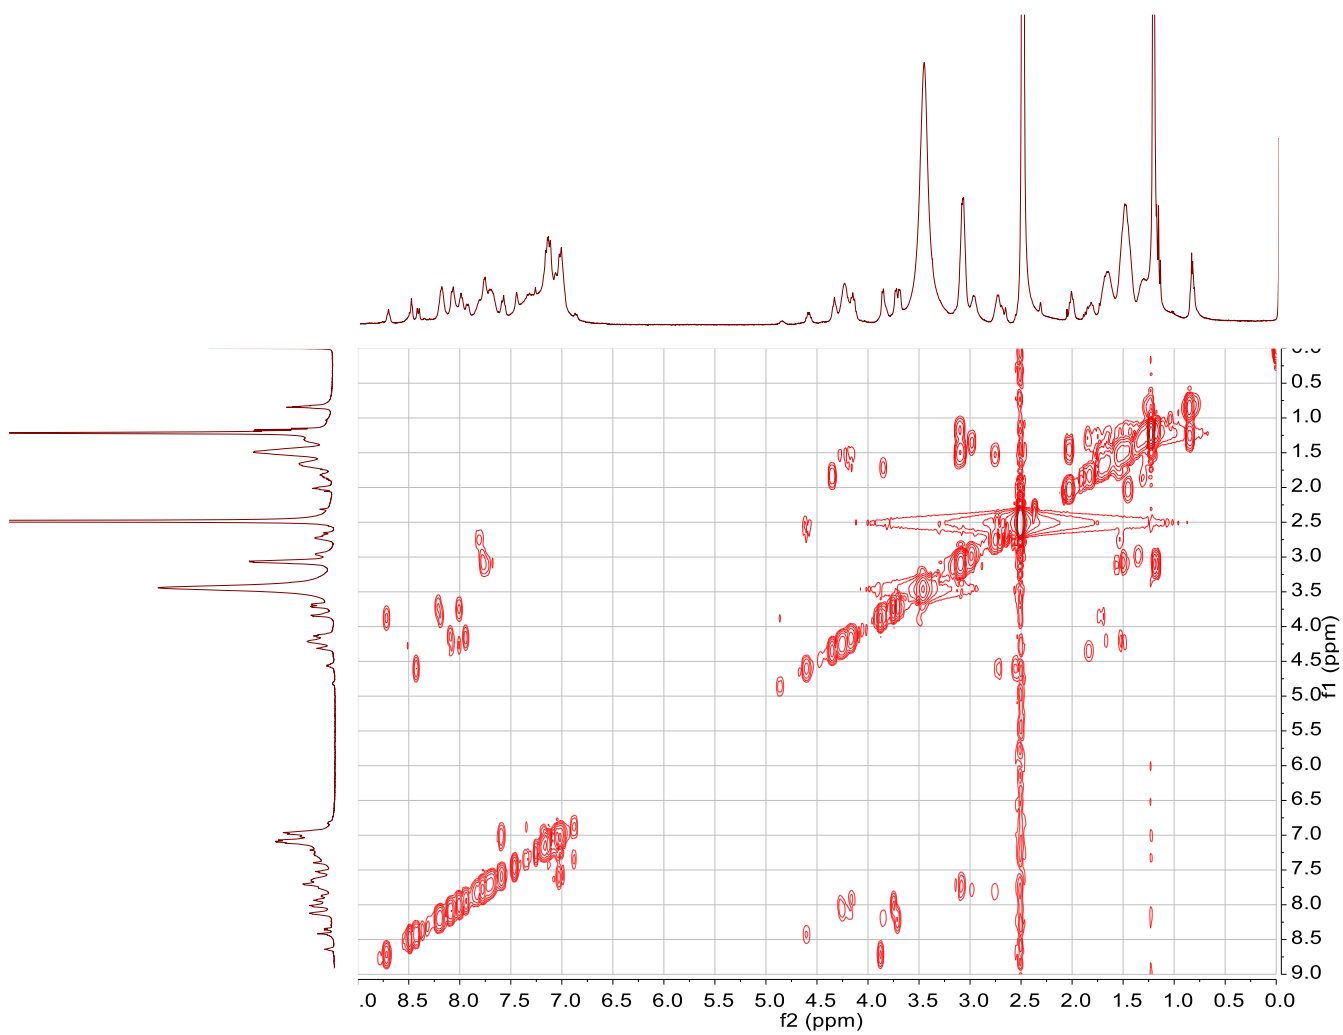

**Figure S7.**  $^1\text{H}$ - $^1\text{H}$  COSY NMR spectrum of *cis*-RTP in  $\text{DMSO-}d_6$ .



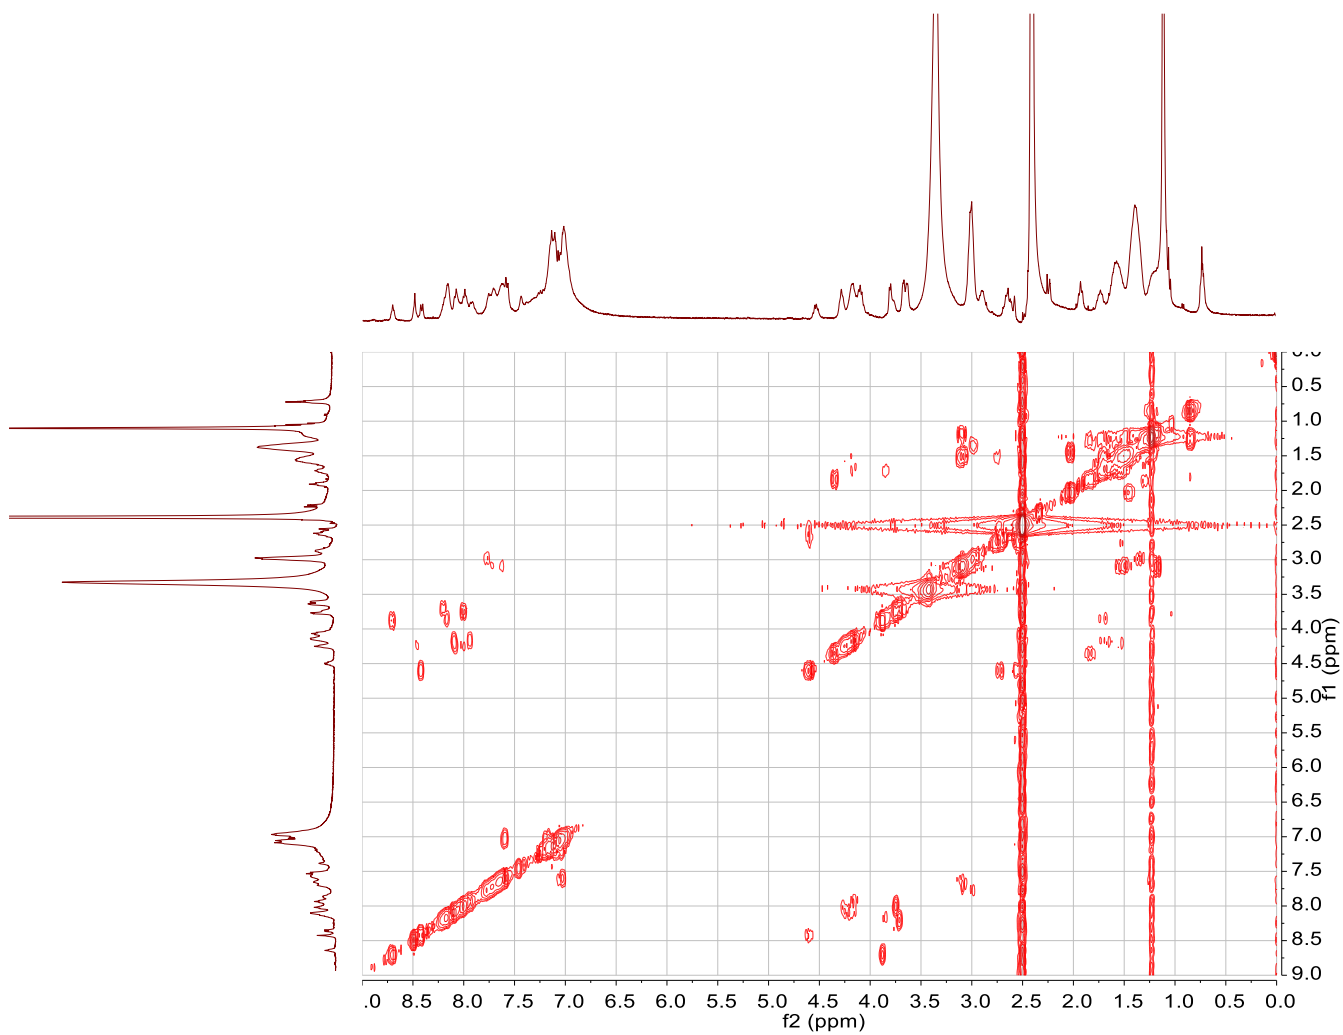

**Figure S8.**  $^1\text{H}$ - $^1\text{H}$  COSY NMR spectrum of *trans*-RTP in  $\text{DMSO-}d_6$ .

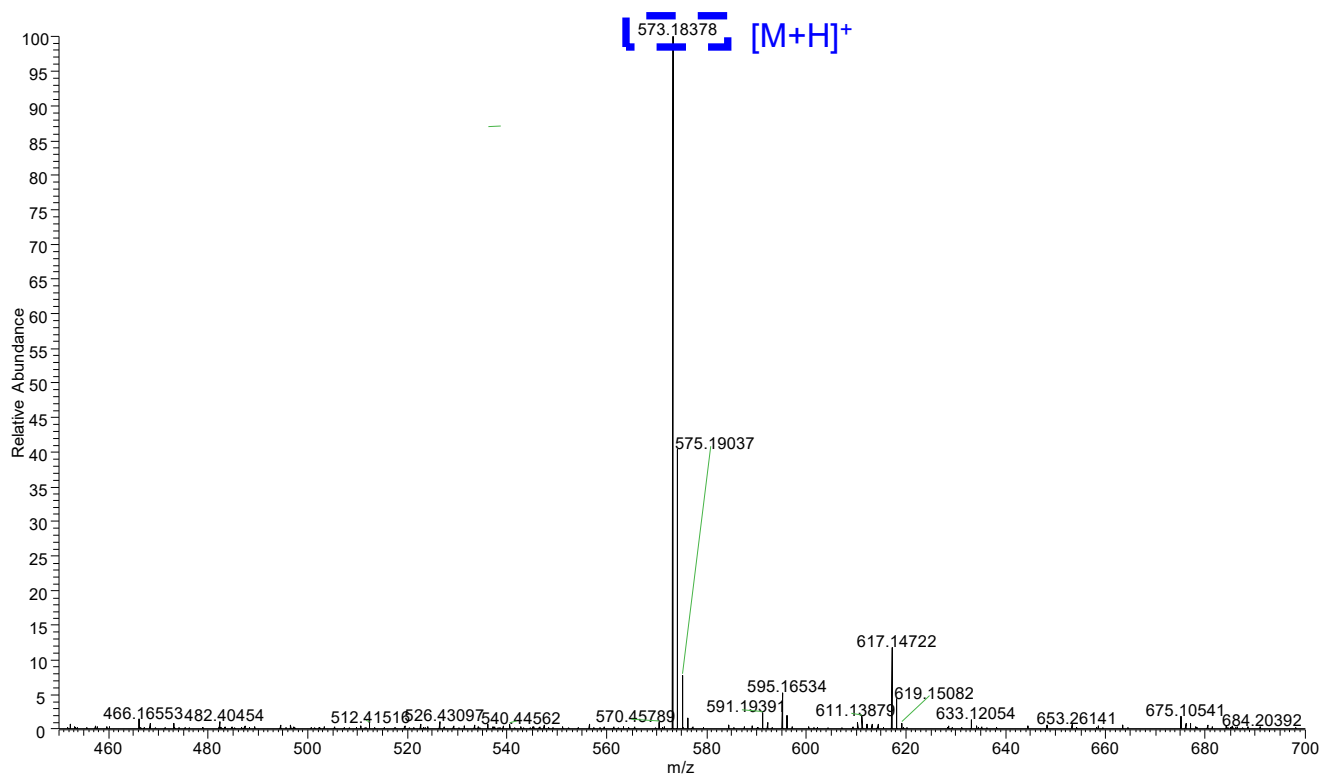

|     |                    |
|-----|--------------------|
| TC  | [M+H] <sup>+</sup> |
| m/z | 573.1843           |

**Figure S9.** HRMS spectrum of TC. The *cis*-TP and *trans*-TP have the same molecule weight.

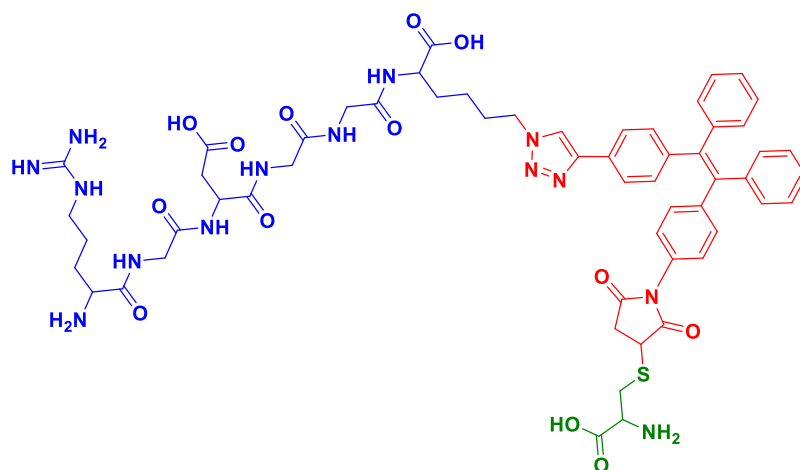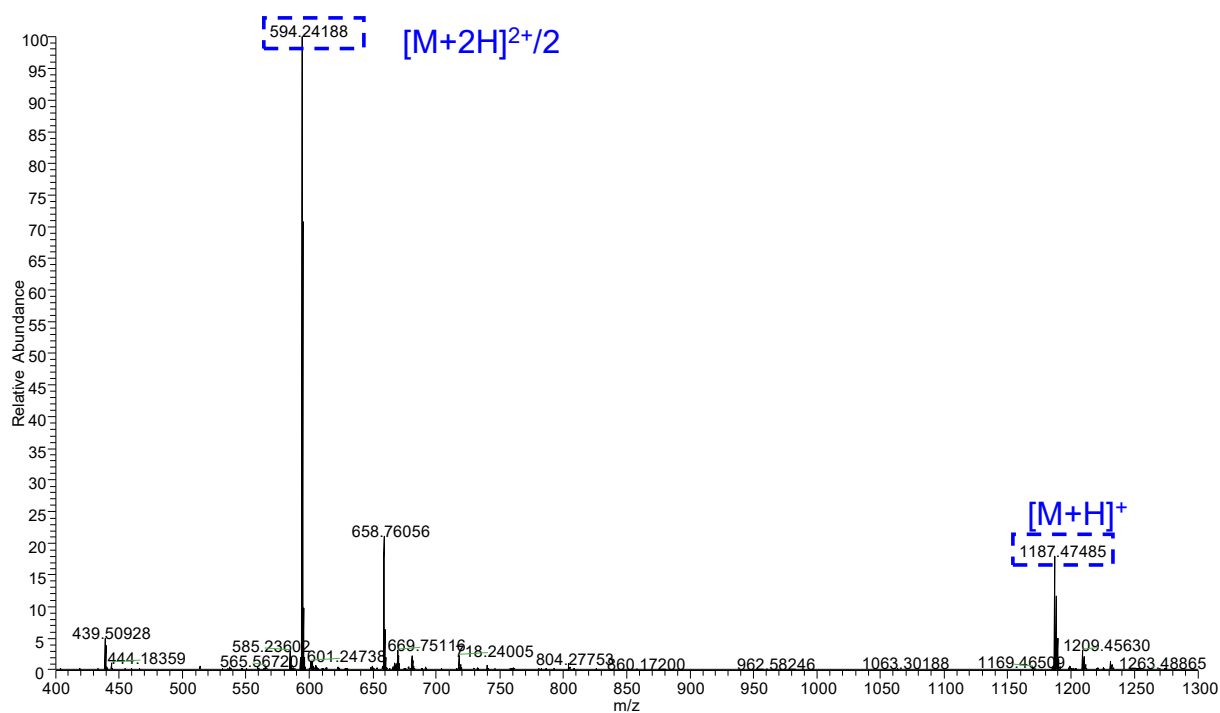

| <i>cis</i> -RTC | $[M+H]^+$ | $[M+2H]^{2+}/2$ |
|-----------------|-----------|-----------------|
| m/z             | 1187.4722 | 594.2397        |

Figure S10. HRMS spectrum of *cis*-RTC.

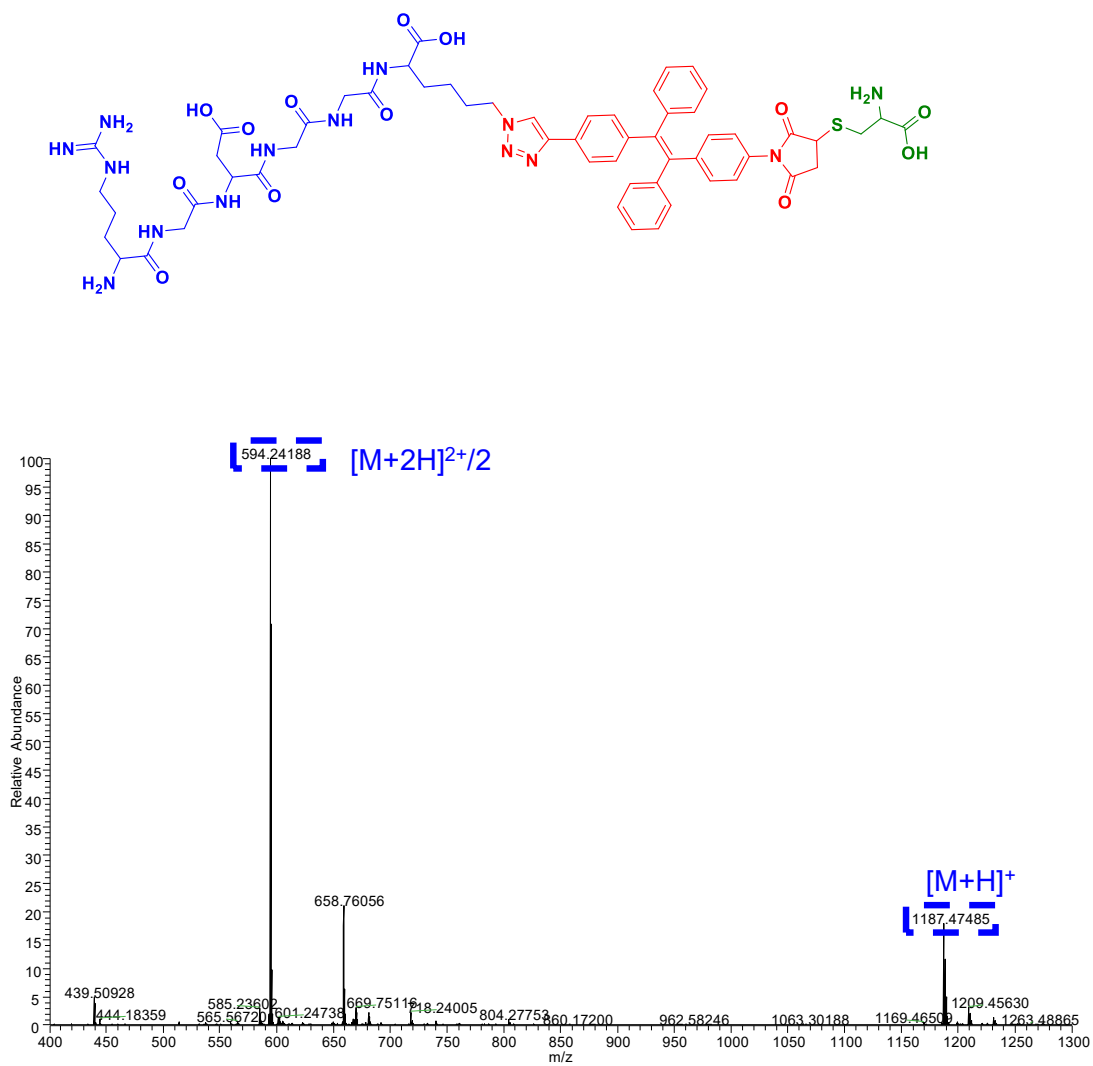

| <i>trans</i> -RTC | $[M+H]^+$ | $[M+2H]^{2+}/2$ |
|-------------------|-----------|-----------------|
| m/z               | 1187.4722 | 594.2397        |

Figure S11. HRMS spectrum of *trans*-RTC.

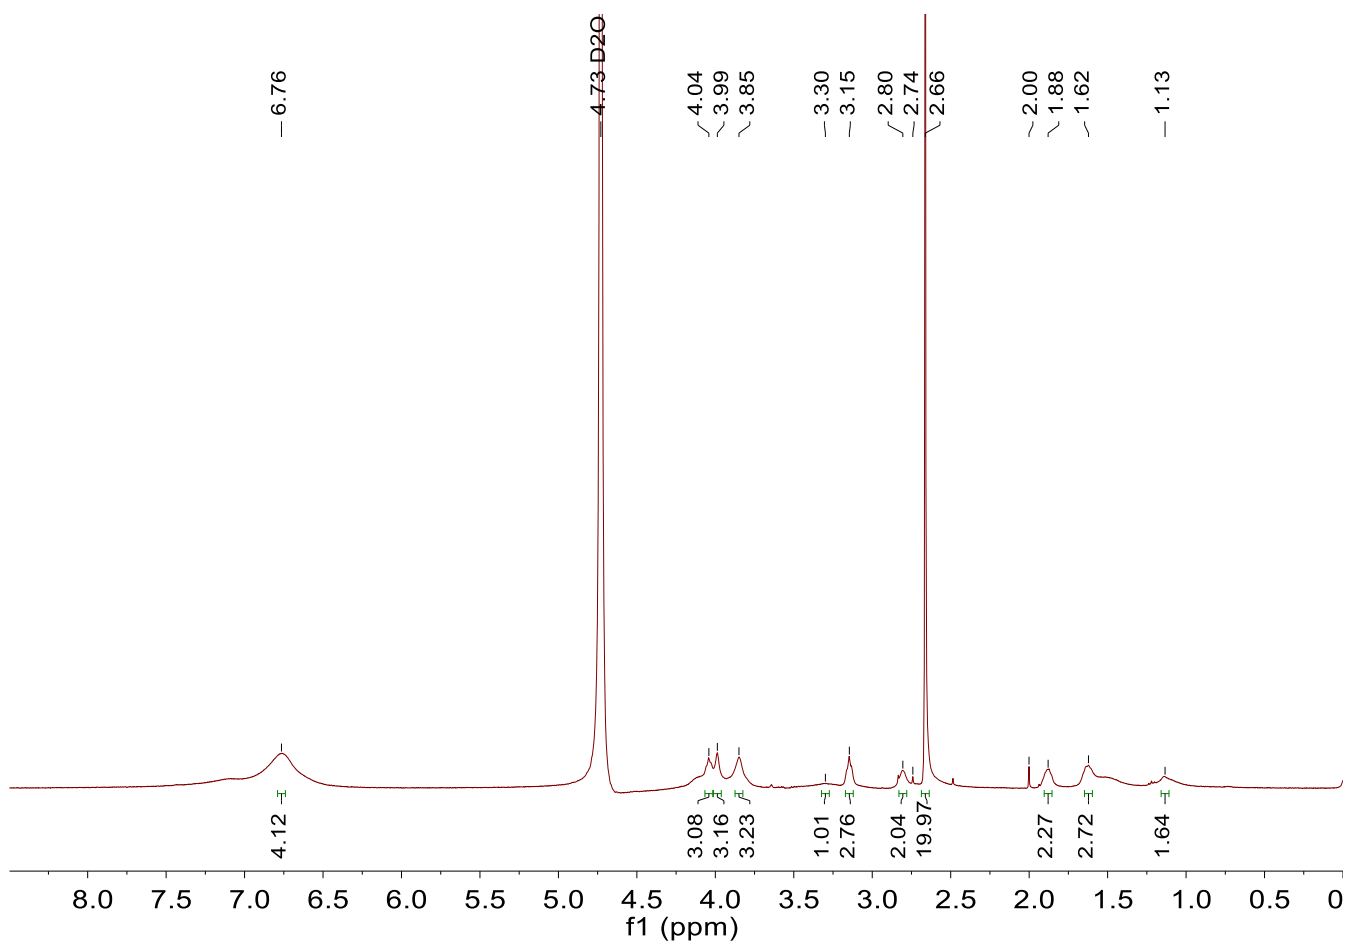

Figure S12.  $^1\text{H}$  NMR spectrum of *cis*-RTC in  $\text{D}_2\text{O}$ .

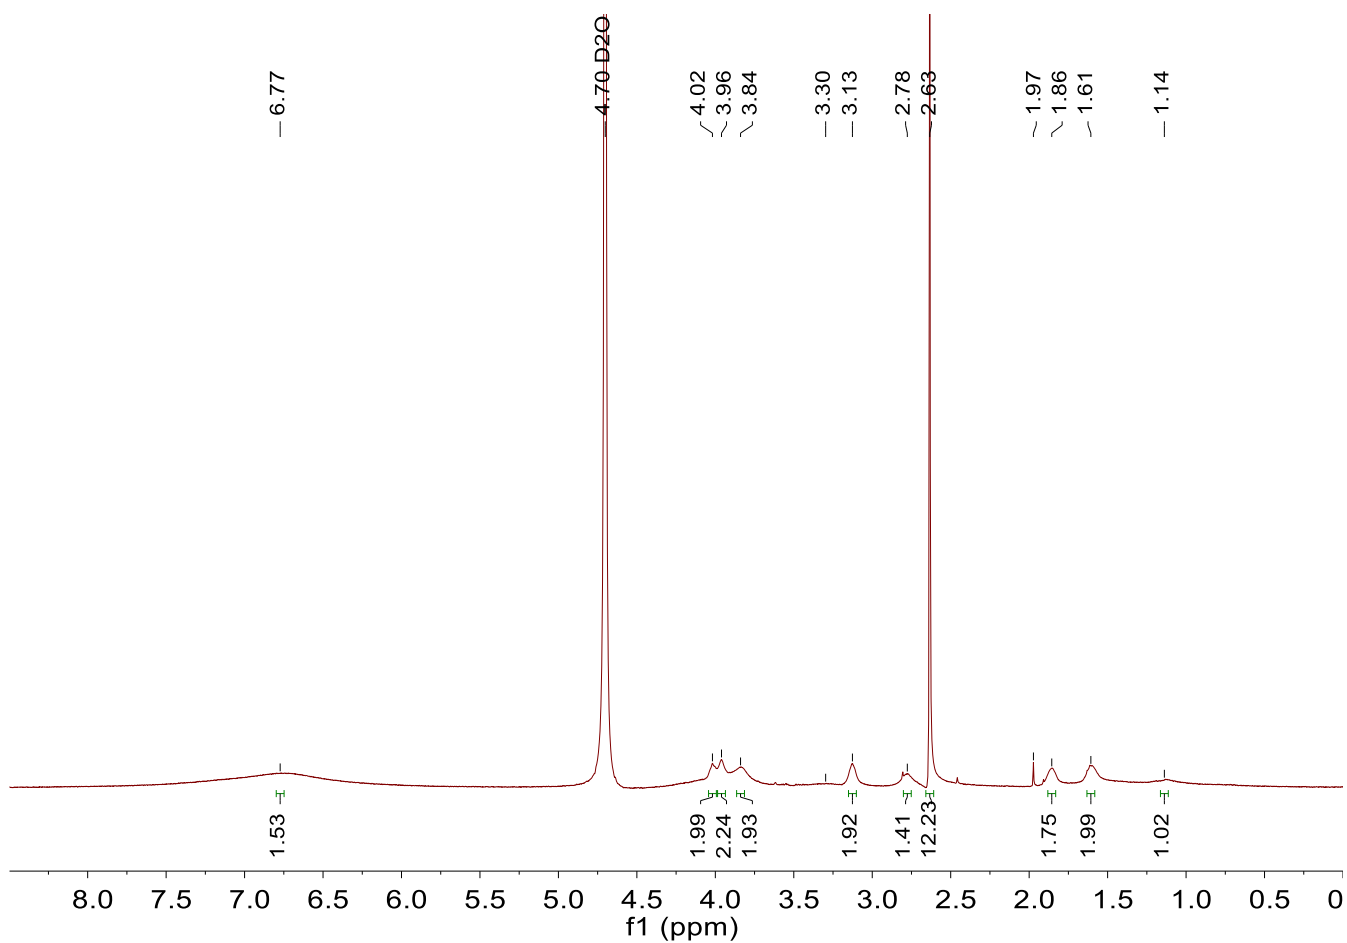

Figure S13.  $^1\text{H}$  NMR spectrum of *trans*-RTC in  $\text{D}_2\text{O}$ .

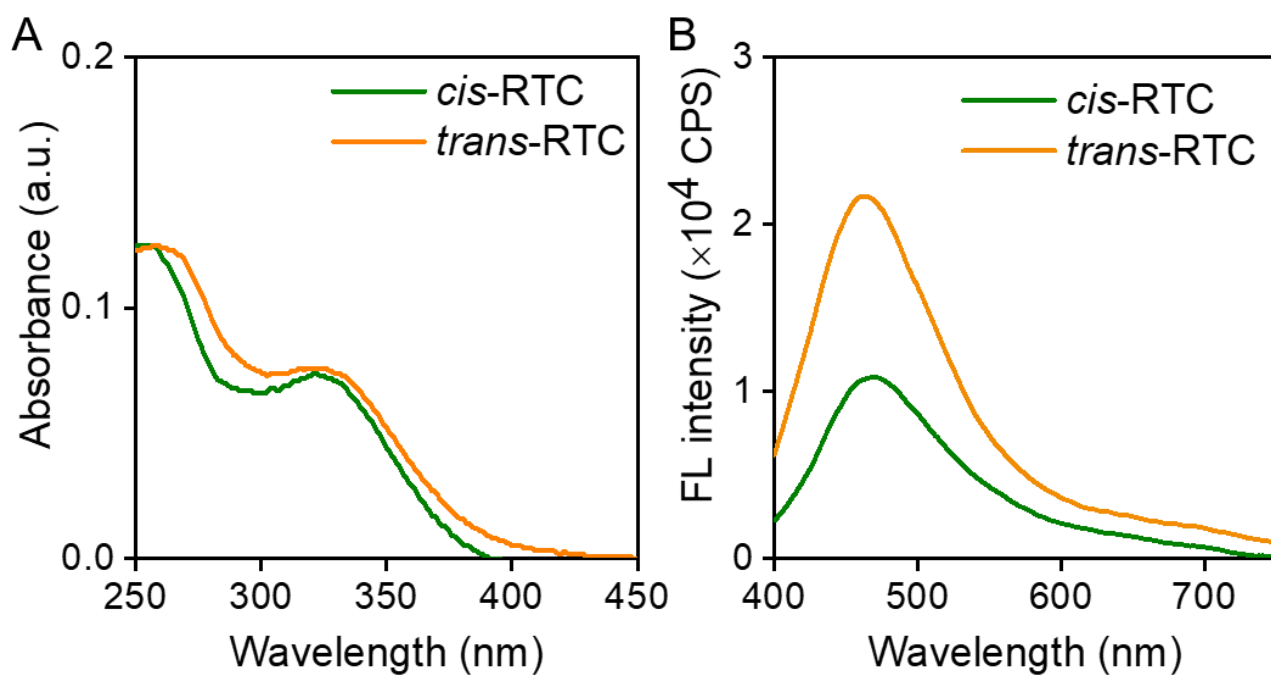

**Figure S14.** UV-vis absorption spectra and FL spectra of *cis*-RTC/*trans*-RTC (10  $\mu$ M) in DMSO/water mixture (v/v=1/99).  $\lambda_{\text{ex}}$  = 330 nm.

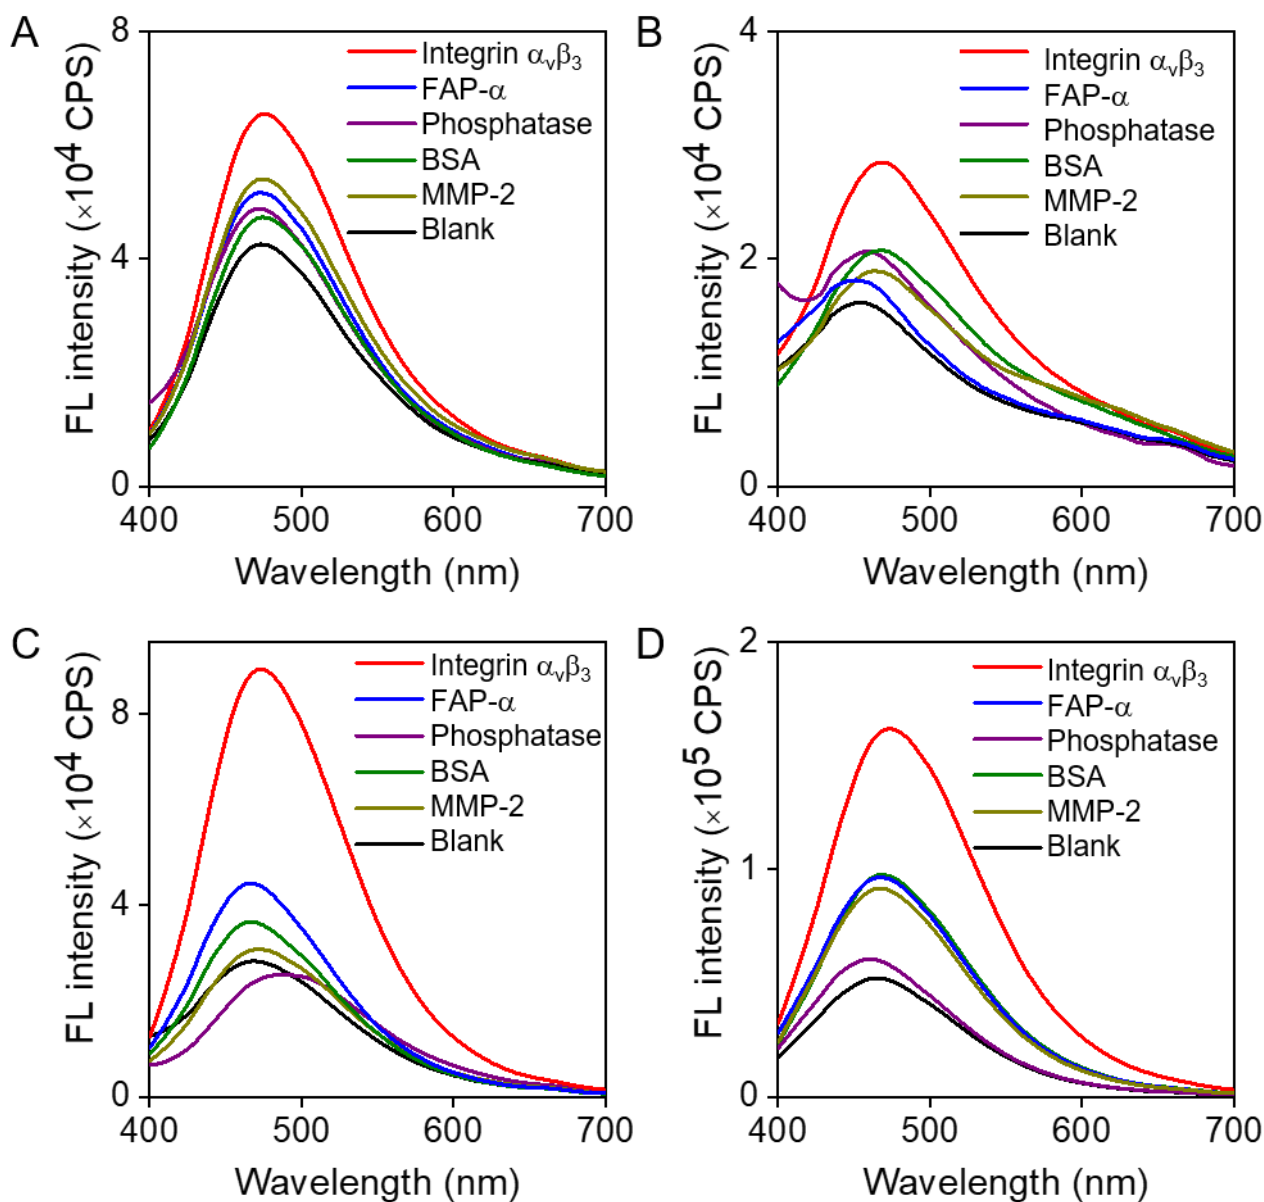

**Figure S15.** FL spectra of (A) *cis*-RTP, (B) *trans*-RTP, (C) *cis*-RTC and (D) *trans*-RTC versus different proteins. The proteins include integrin  $\alpha_v\beta_3$ , fibroblast activation protein- $\alpha$  (FAP- $\alpha$ ), phosphatase, bovine serum albumin (BSA) and matrix metalloproteinase 2 (MMP-2). The concentration of the probes was 40  $\mu$ M,  $\lambda_{\text{ex}} = 330$  nm.



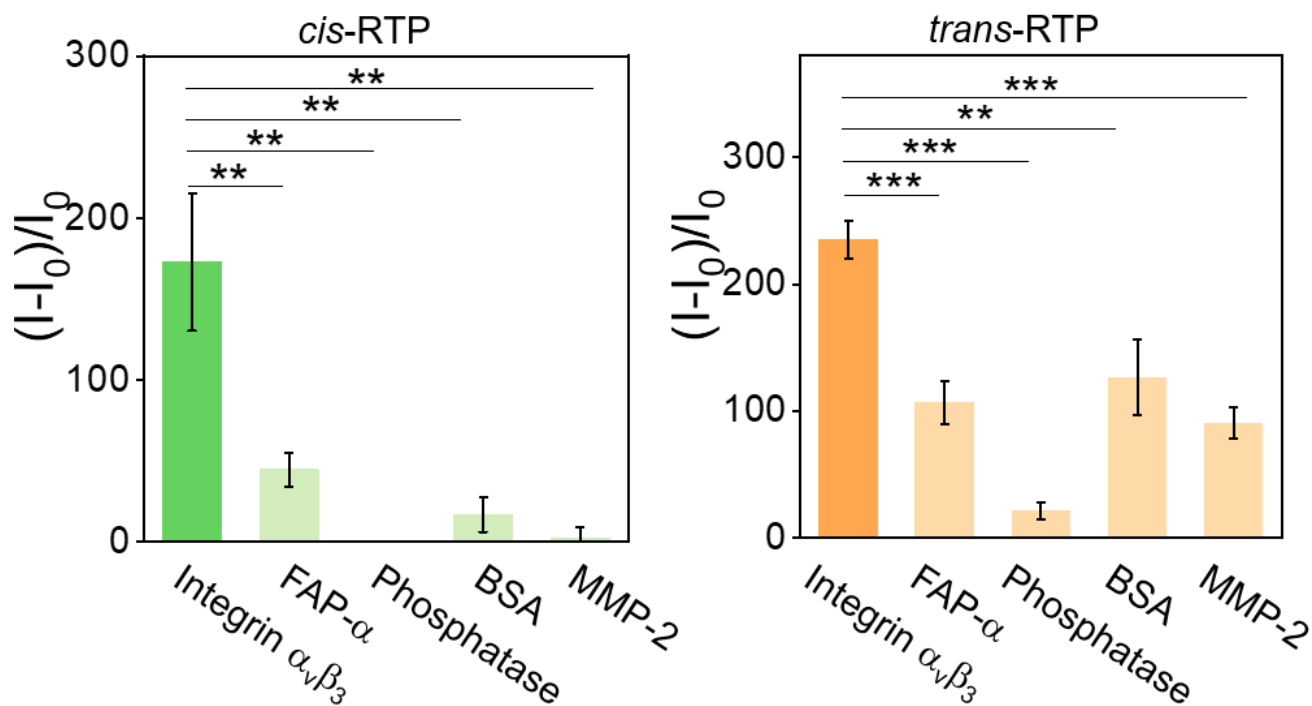

**Figure S16.** Plot of  $(I-I_0)/I_0$  versus different proteins, where  $I$  and  $I_0$  were the FL intensities at analyte concentrations of 100 and 0  $\mu\text{g mL}^{-1}$ . The proteins include  $\alpha_v\beta_3$ , FAP- $\alpha$ , phosphatase, BSA and MMP-2. The concentration of the probes was 40  $\mu\text{M}$ ,  $\lambda_{\text{ex}} = 330 \text{ nm}$ .

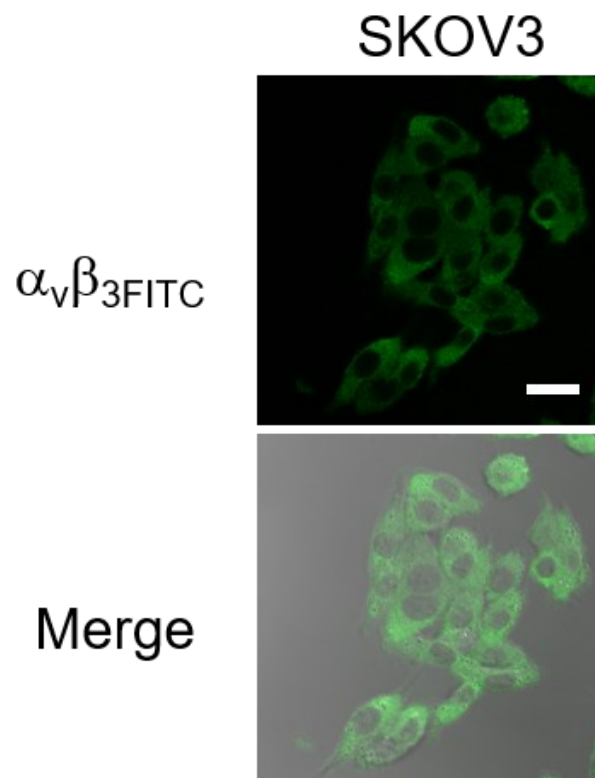

**Figure S17.** The CLSM images of SKOV3 cells. The cells were incubated with 10  $\mu\text{g}/\text{mL}$  FITC-labelled  $\alpha_v\beta_3$ -antibody for 1 h in cell culturing condition, respectively. Scale bar: 20  $\mu\text{m}$ .

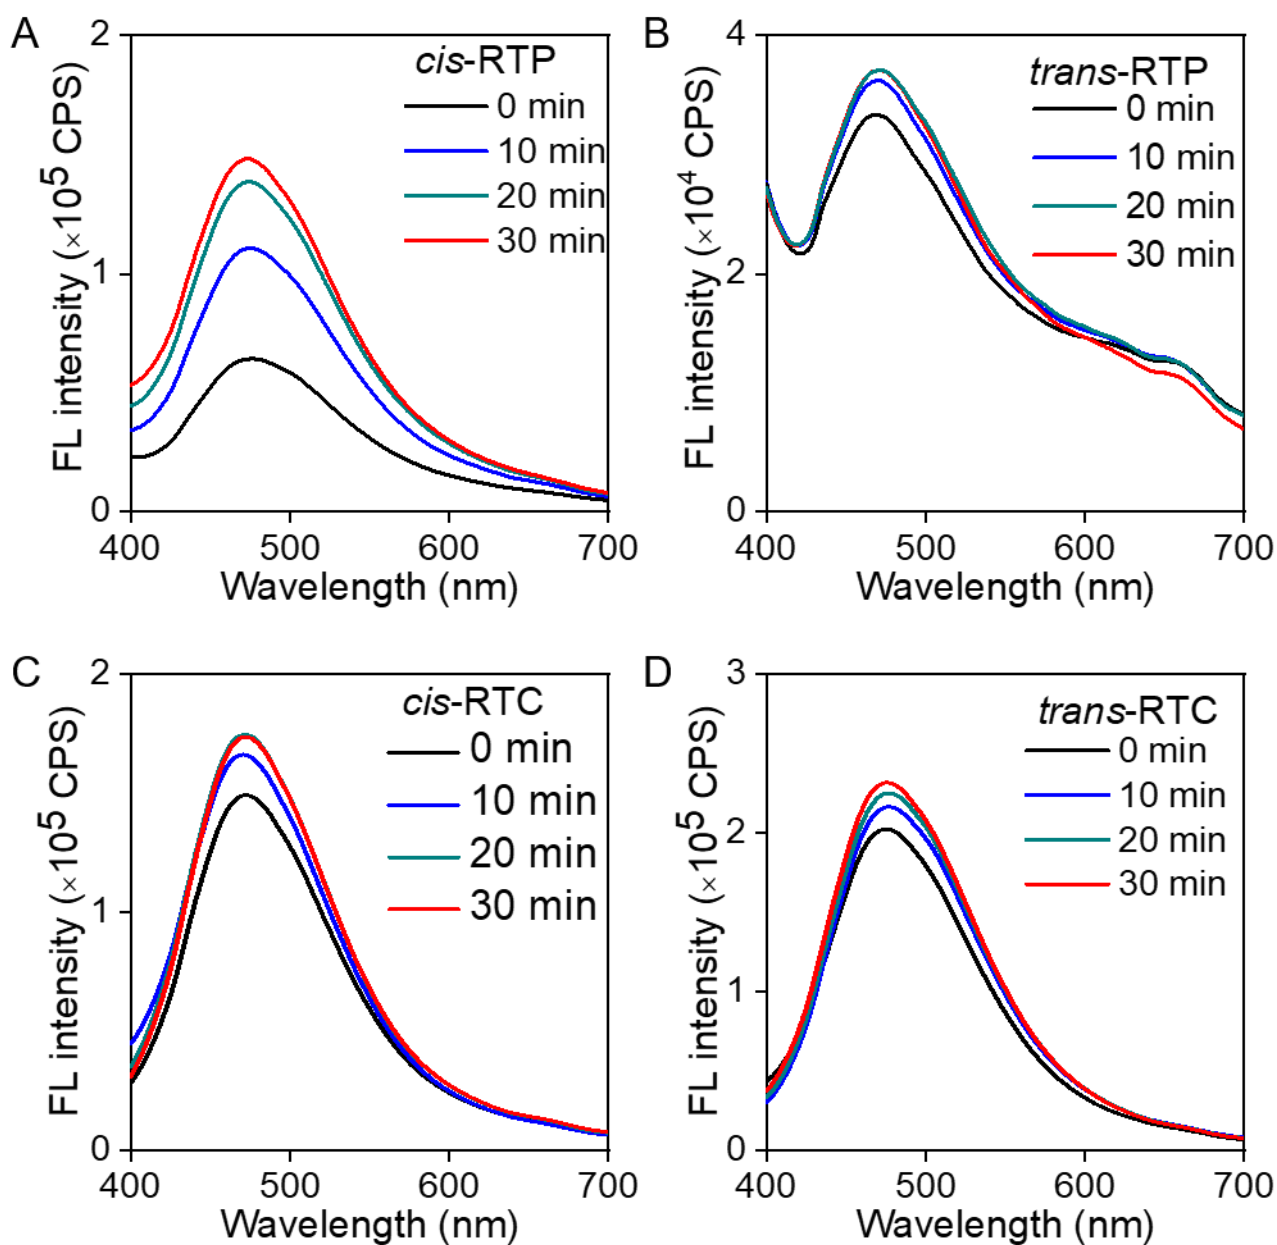

**Figure S18.** FL spectra of (A) *cis*-RTP, (B) *trans*-RTP, (C) *cis*-RTC and (D) *trans*-RTC with extracted cell membrane for different times. The concentration of the probes was 40  $\mu\text{M}$  and the concentration of integrin  $\alpha_v\beta_3$  was 100  $\mu\text{g mL}^{-1}$ ,  $\lambda_{\text{ex}} = 330 \text{ nm}$

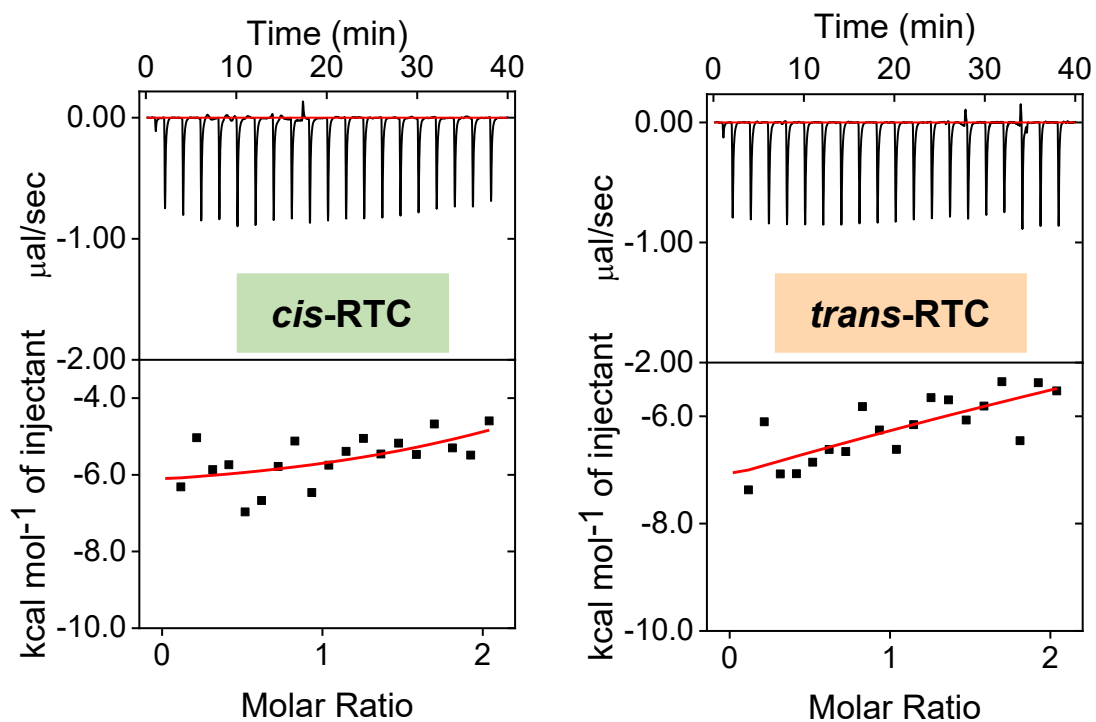

**Figure S19.** ITC results of *cis*-RTC/*trans*-RTC in PBS with cell membrane at 37 °C. The concentration of the probes was 40  $\mu\text{M}$ .

*cis*-RTP

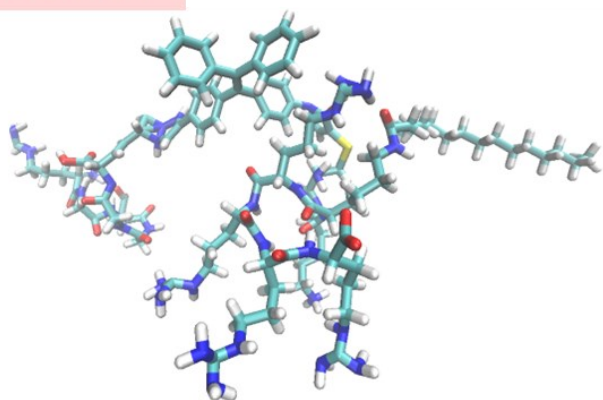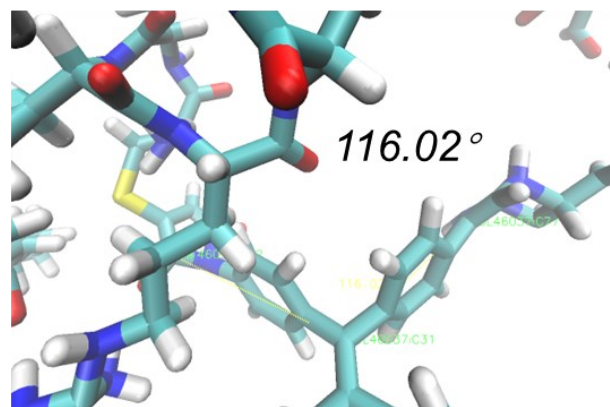

*trans*-RTP

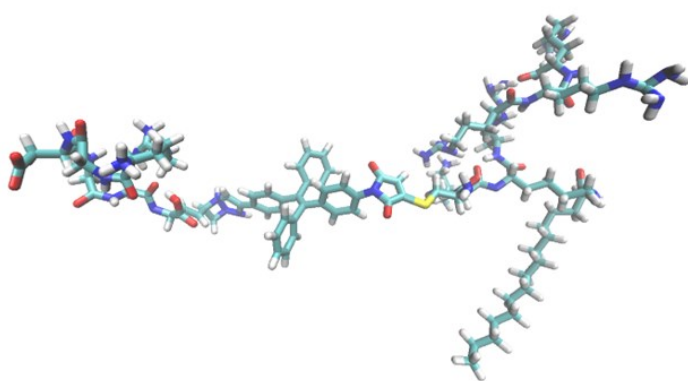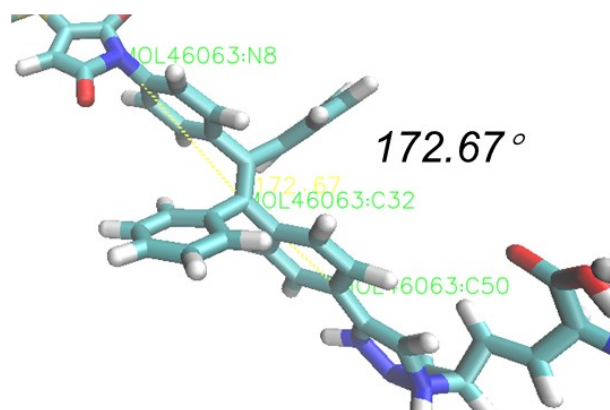

**Figure S20.** The angles between the linkages of RGD and Pal-RRRR to benzene rings in *cis*-RTP and *trans*-RTP.

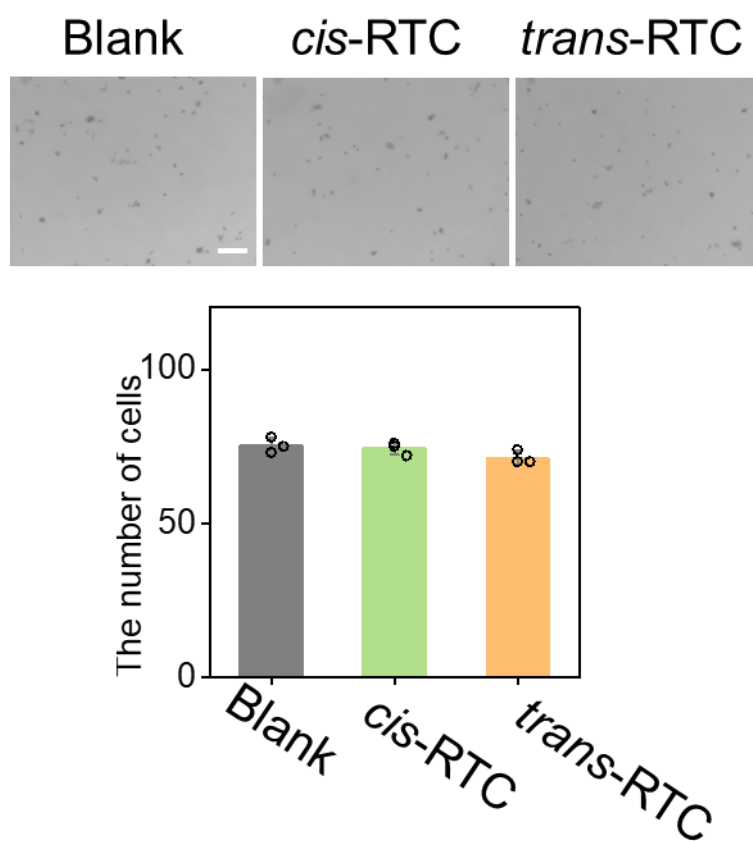

**Figure S21.** The adhesion result of suspended SKOV3 cells incubated with *cis*-RTC/*trans*-RTC (40  $\mu$ M) for 1 h and then incubated with fresh medium for 4 h and correspondingly quantitative data of adherent SKOV3 cells in three separate fields. Scale bars: 200  $\mu$ m.

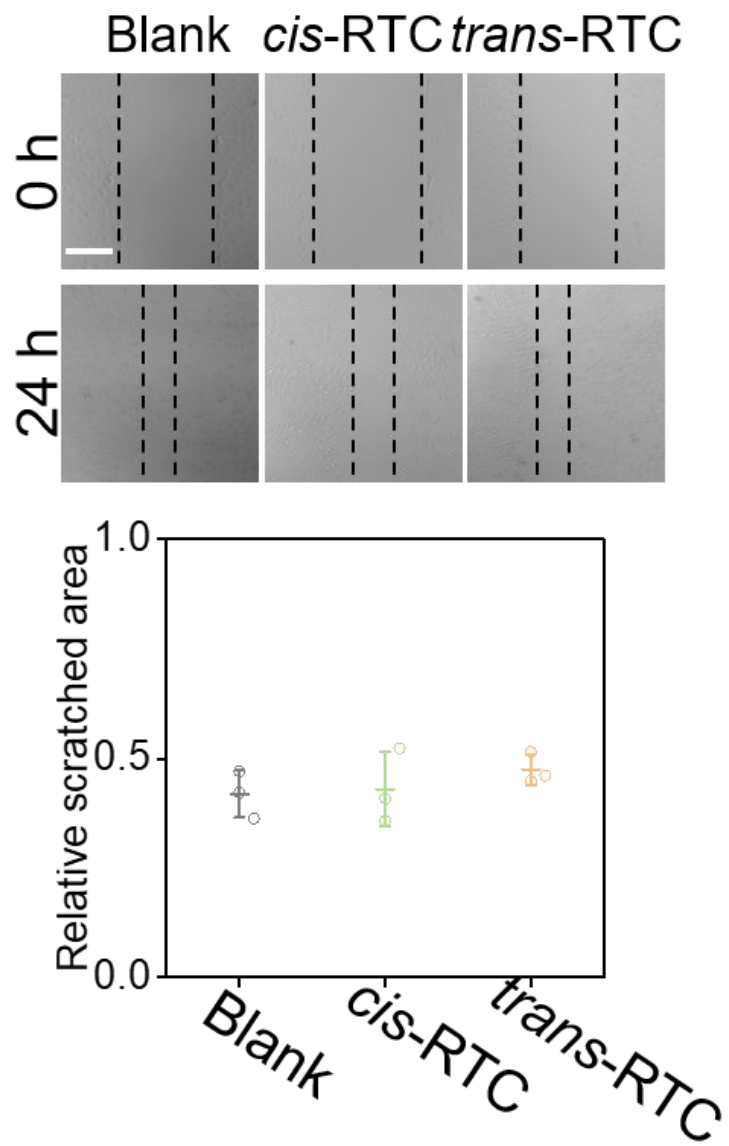

**Figure S22.** Cell migration of SKOV3 cells incubated with *cis*-RTC/*trans*-RTC (40  $\mu$ M) for 1 h and then incubated with fresh medium and closure degree of the scratched area was expressed as a percentage of the initial scratched area. Scale bar: 100  $\mu$ m.

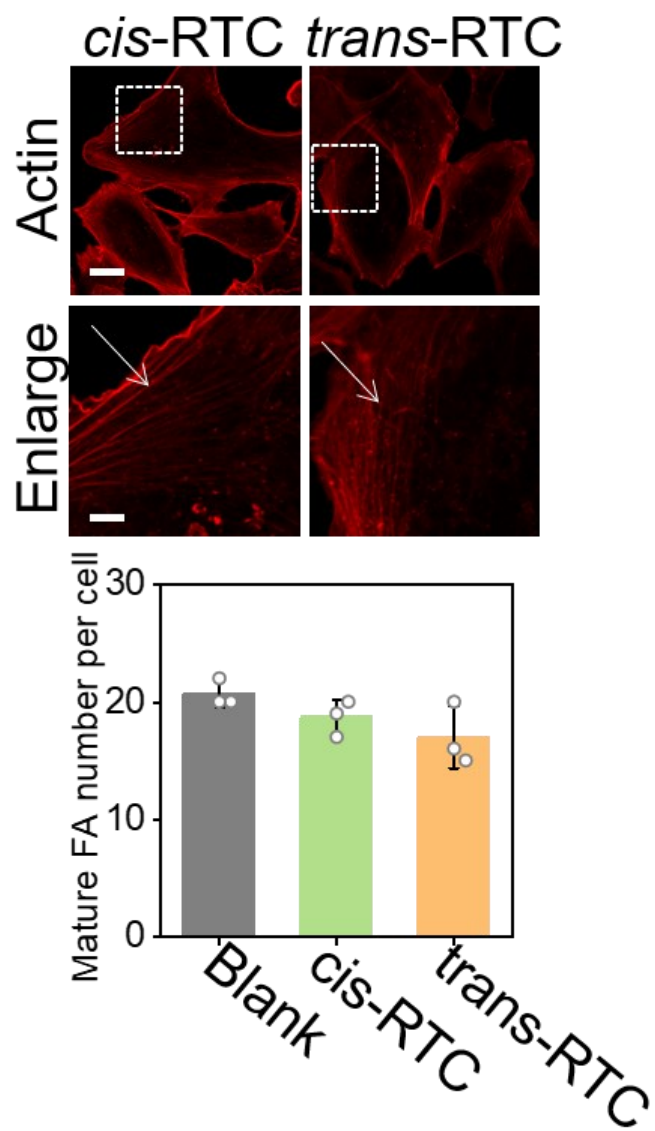

**Figure S23.** CLSM images of the actin in SKOV3 cells incubated with *cis*-RTP/*trans*-RTP (40  $\mu$ M) for 1 h, then stained with Actin-Tracker Red-555 and quantification of dorsal bundle number. The scale bar of actin images was 20  $\mu$ m and scale bar of enlarged images was 5  $\mu$ m.
